# Supplementary material
Source: Springer Nature journal article supplement (https://www.springermedizin.de/resource/supplementary/12935_2011_294_MOESM1_ESM.pdf/9540246)

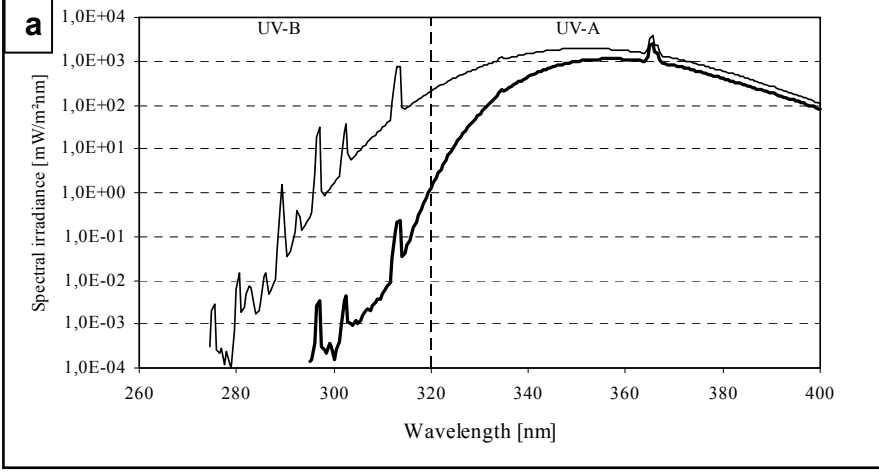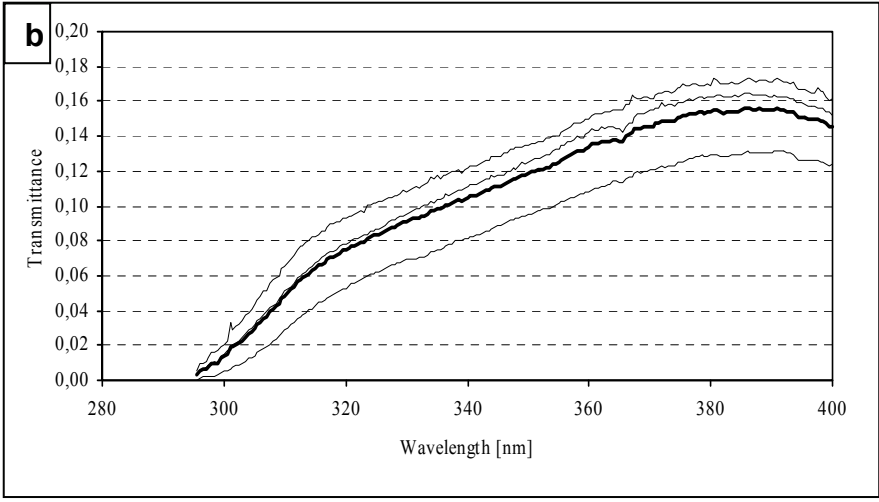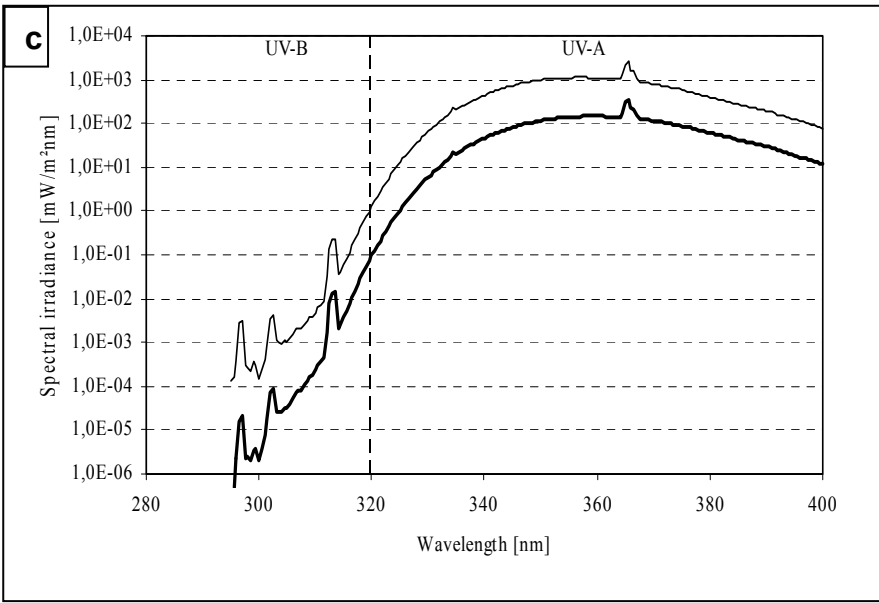

Supplement: MOESM1 [file 9540246]
